# Supplementary material
Source: PubMed Central journal article supplement (PMC5298820)

Figure S1

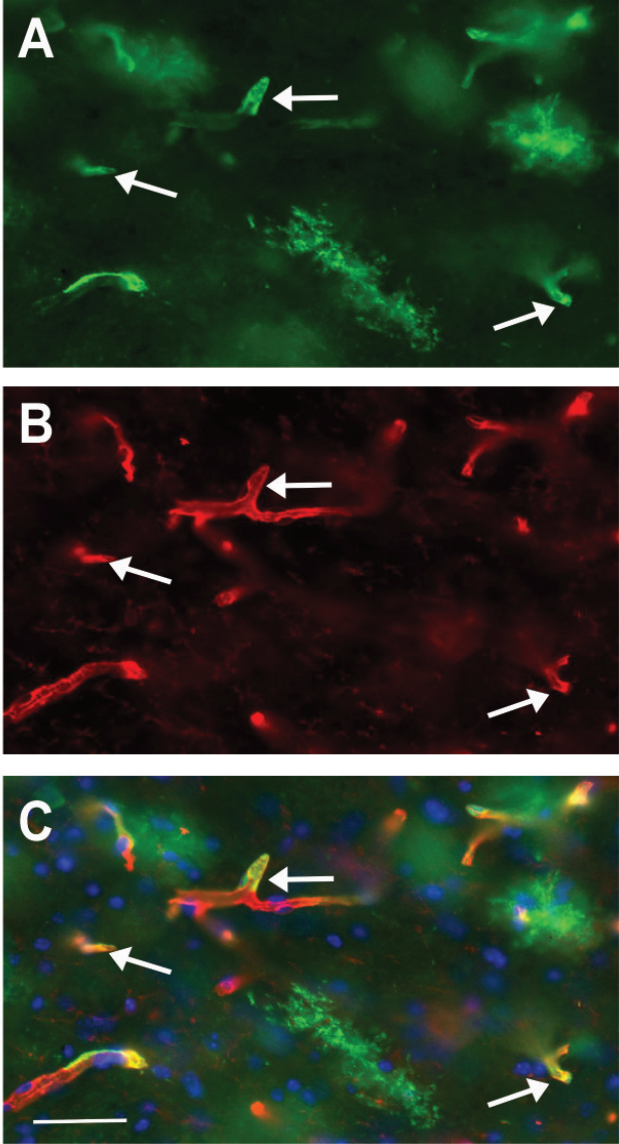

Figure S2

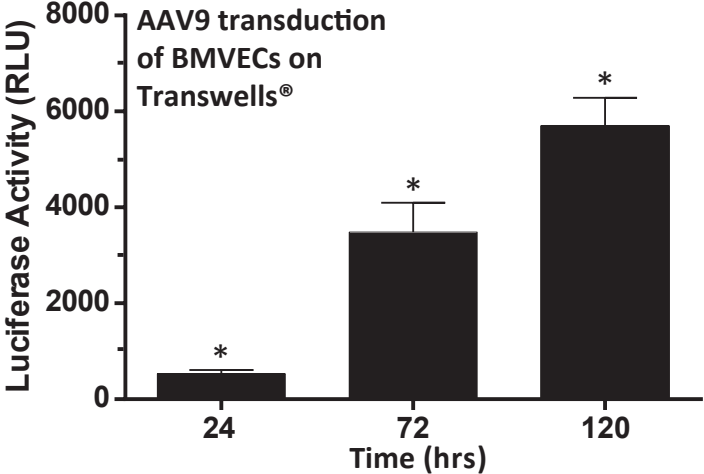

Supplement: NIHMS822576-supplement-Supp_Fig_S1-S2.pdf [file NIHMS822576-supplement-Supp_Fig_S1-S2.pdf]
